# Supplementary material
Source: MDPI journal article supplement (https://www.mdpi.com/2571-8789/6/3/72)
Supplement: s1 [file s1]

## Supplementary Information

# Optimum rate and deep placement of nitrogen fertilizer improves nitrogen use efficiency and tomato yield in Nepal

Naba Raj Pandit <sup>1\*</sup>, Dyutiman Choudhary <sup>1</sup>, Shashish Maharjan <sup>1</sup>, Krishna Dhakal <sup>2</sup>, Shree Prasad Vista <sup>3</sup>, Yam Kanta Gaihre <sup>4</sup>

<sup>1</sup> International Maize and Wheat Improvement Center (CIMMYT), Khumaltar, Lalitpur, Nepal; n.pandit@cgiar.org

<sup>2</sup> Nepal Agricultural Research Council (NARC), DoAR Karnali Province, Dasharathpur, Surkhet; krishnadhakal19@gmail.com

<sup>3</sup> Nepal Agricultural Research Council (NARC), National Soil Science Research Center (NSSRC), Khumaltar, Lalitpur, Nepal; spvista002@gmail.com

<sup>4</sup> International Fertilizer Development Center (IFDC), Khumaltar, Lalitpur, Nepal; ygaihre@ifdc.org

\* Correspondence: n.pandit@cgiar.org

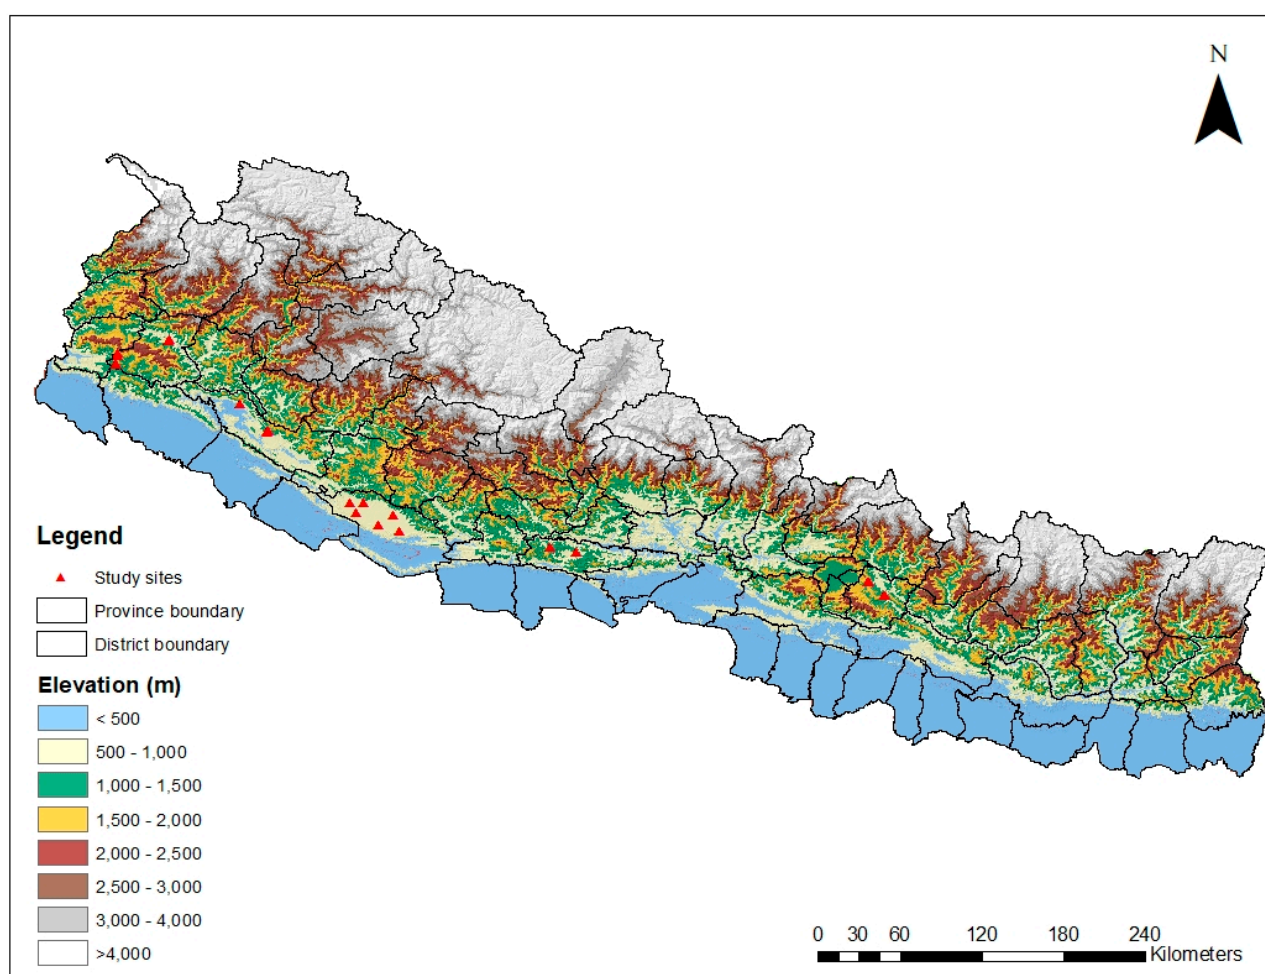

**Figure S1.** Field trial locations across five districts in Nepal (Source: Department of Survey, Nepal)

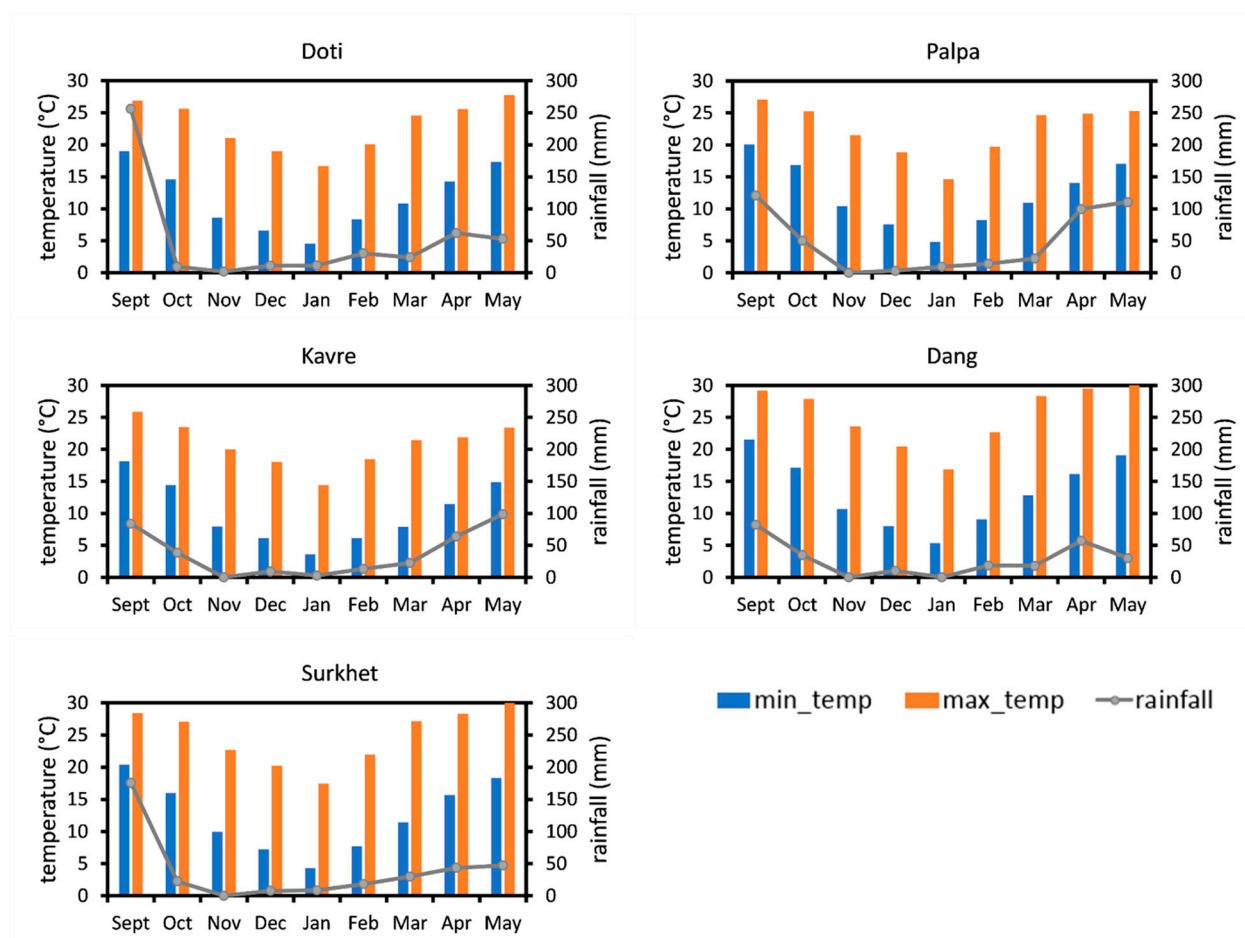

**Figure S2.** Annual minimum, maximum temperatures, and precipitation during growing period of tomato across five districts in the year 2018. Temperature and rainfall data were extracted from National Oceanic and Atmospheric Administration (NOAA; <https://psl.noaa.gov>) and rainfall estimates from Rain Gauge and Satellite Observations (CHIRPS; <ftp://ftp.chg.ucsb.edu/pub/org/chg/products/CHIRPS-2.0>) respectively.

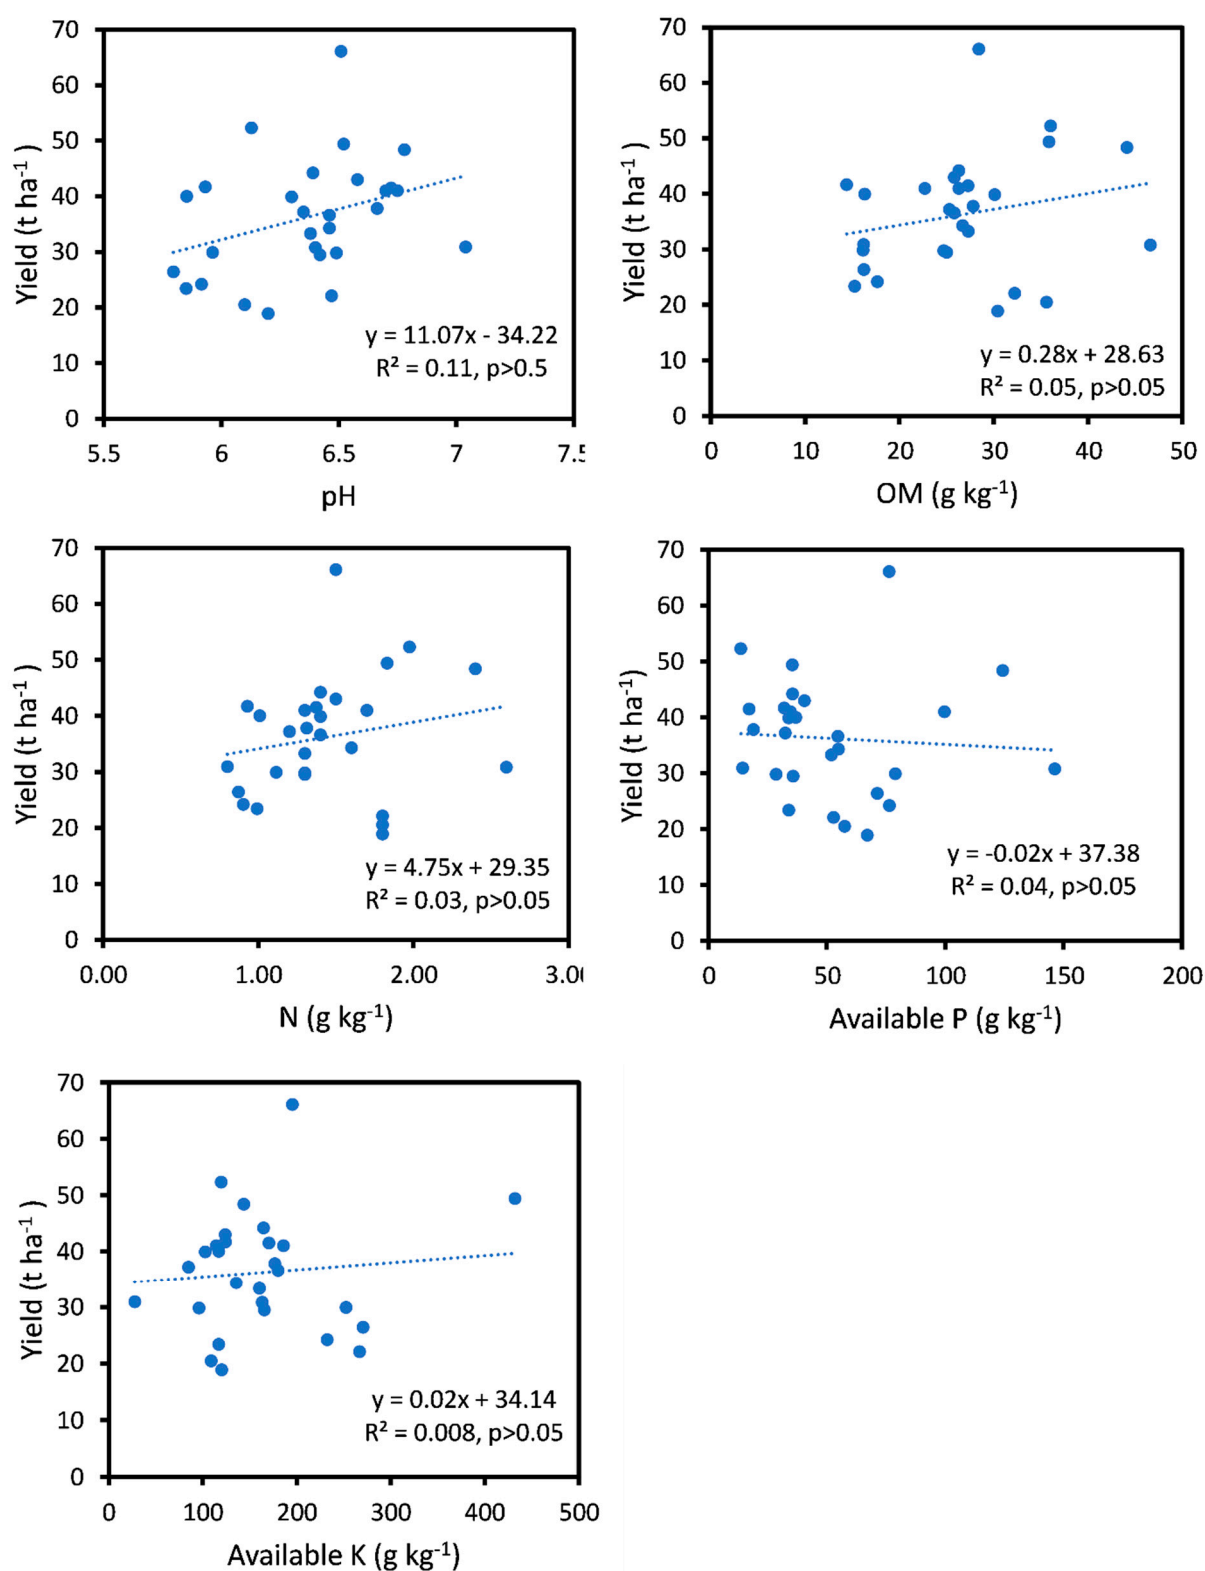

**Figure S3.** Relationship between soil chemical properties and yield to identify indigenous soil nutrient supply across the districts (n=28).
